# Supplementary material
Source: publisher figshare collection journal article supplement (https://acs.figshare.com/ndownloader/files/18508667)
Supplement: Supplementary file 1 [file 18508667]

## Supporting information

### **MiR-326 inhibits inflammation and promotes autophagy in silica-induced pulmonary fibrosis through targeting TNFSF14 and PTBP1**

Tiantian Xu <sup>1†</sup>, Weiwen Yan <sup>1†</sup>, Qiuyun Wu <sup>2†</sup>, Qi Xu<sup>1</sup>, Jiali Yuan <sup>1</sup>, Yan Li <sup>1</sup>, Ping Li<sup>1</sup>, Honghong Pan<sup>1</sup>, Chunhui Ni <sup>1\*</sup>

<sup>1</sup> Center for Global Health, Key Laboratory of Modern Toxicology of Ministry of Education, School of Public Health, Nanjing Medical University, Nanjing 210029, China

<sup>2</sup> School of Public Health, Xuzhou Medical University, Xuzhou 221004, China

† These authors contributed equally to this work.

\* Correspondence should be addressed to Chunhui Ni, Center for Global Health, Key Laboratory of Modern Toxicology of Ministry of Education, School of Public Health, Nanjing Medical University, Nanjing 210029, China. E-mail address: chni@njmu.edu.cn, chninjmu@126.com; Street address: 818th, Tianyuan Road, Nanjing, China. Tel: +86-25-8686-8418; Fax: +86-25-8686-8499

#### **Table of contents**

|                |         |
|----------------|---------|
| Figure S1..... | Page S2 |
| Figure S2..... | Page S3 |
| Figure S3..... | Page S4 |
| Figure S4..... | Page S6 |
| Figure S5..... | Page S7 |
| Figure S6..... | Page S8 |

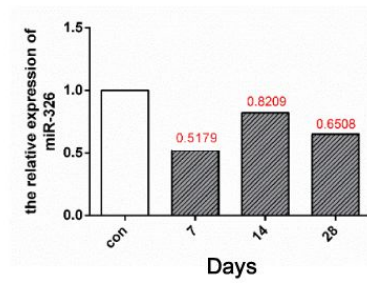

**Figure S1. The expression of miR-326 in fibrotic lung tissues of mice.**

The expression of miR-326 in mouse lung tissues of the SiO<sub>2</sub> group compared to the control group according to our miRNA microarray data.

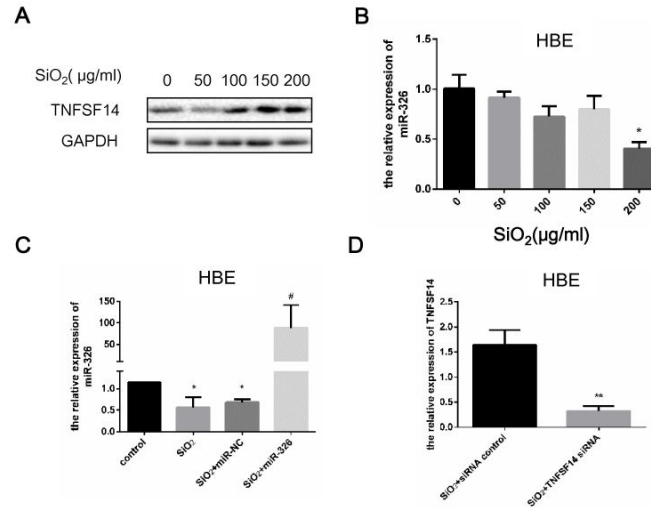

**Figure S2. MiR-326 dampens lung inflammation by targeting TNFSF14 in HBE cells.**

**A:** The HBE cells were exposed to SiO<sub>2</sub> (0, 50, 100, 150, 200µg/ml) for 24 h. The protein level of TNFSF14 was detected by western blot assay. **B:** The HBE cells were exposed to SiO<sub>2</sub> (0, 50, 100, 150, 200 µg/ml) for 24 h. qRT-PCR analysis was performed to detect miR-326 levels (mean ± SD, n=3), \**P* < 0.05 compared with 0 µg/ml SiO<sub>2</sub> group. **C:** The HBE cells were transfected with miR-326 mimic. QRT-PCR was performed to detect miR-326 levels (mean ± SD, n=3), \**P* < 0.05 compared with 0 µg/ml SiO<sub>2</sub> treated cells. #*P* < 0.05 compared with the SiO<sub>2</sub> + mimic-NC group. **D:** HBE cells were transfected with TNFSF14 siRNA. QRT-PCR was performed to detect TNFSF14 levels (mean ± SD, n=3), \*\**P* < 0.01 compared with the SiO<sub>2</sub> + siRNA control group.

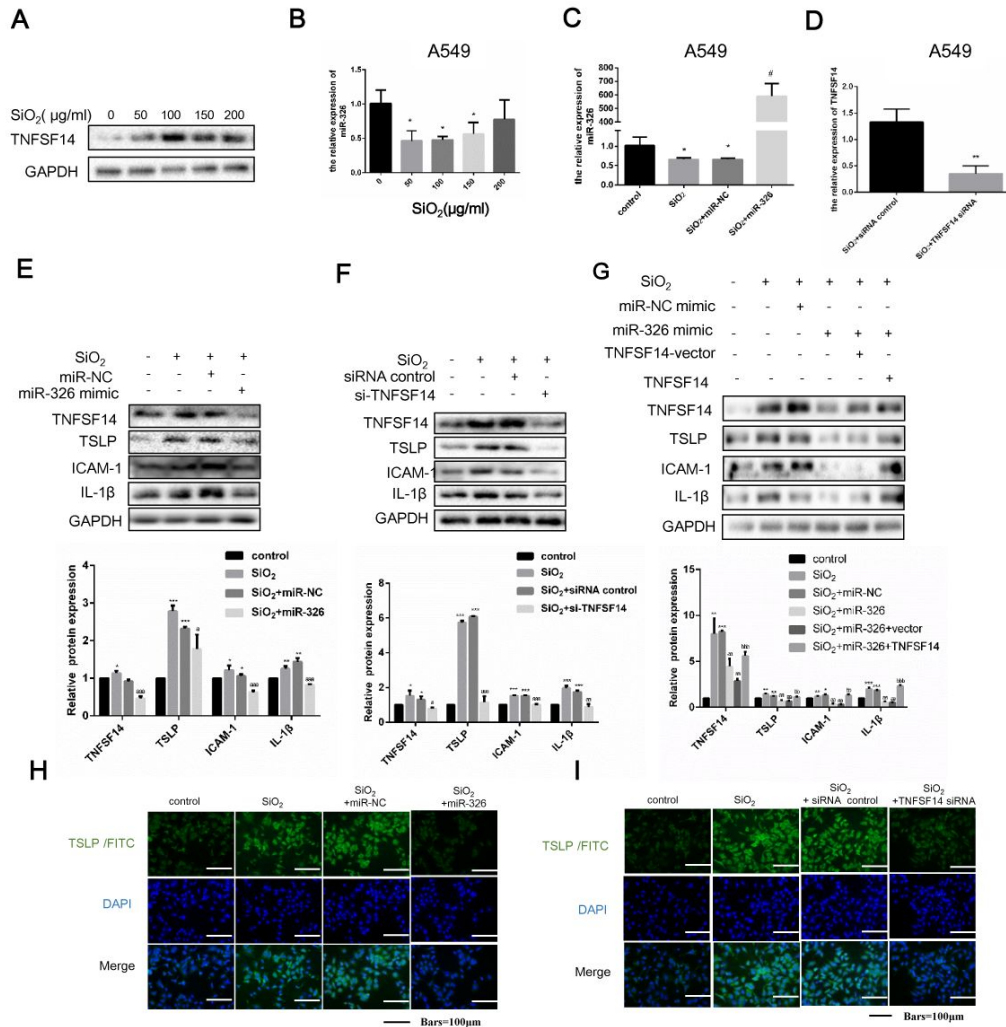

**Figure S3. MiR-326 inhibits lung inflammation in mice by targeting TNFSF14 in A549 cells.**

**A:** A549 were exposed to SiO<sub>2</sub> (0, 50, 100, 150, 200 μg/ml) for 24 h. The protein level of TNFSF14 was detected by western blot assays. **B:** A549 cells were exposed to SiO<sub>2</sub> (0, 50, 100, 150, 200 μg/ml) for 24 h. QRT-PCR was performed to detect miR-326 levels (mean ± SD, n=3), \**P* < 0.05 compared with 0 μg/ml SiO<sub>2</sub> group. **C:** A549 cells were transfected with miR-326 mimic. QRT-PCR was performed to detect miR-326 levels (mean ± SD, n=3), \**P* < 0.05 compared with 0 μg/ml SiO<sub>2</sub> treated cells. #*P* < 0.05 compared with the SiO<sub>2</sub>+mimic-NC group. **D:** A549 cells were transfected with TNFSF14 siRNA. QRT-PCR was performed to detect TNFSF14 levels (mean ± SD, n=3), \*\**P* < 0.01 compared with the SiO<sub>2</sub> plus siRNA control group. **E:** A549 cells were transfected with miR-326 mimic. Western blot were performed to determine TNFSF14, TSLP, ICAM-1 and IL-1β protein levels (mean ± SD, n=3), \**P* < 0.05 compared with the SiO<sub>2</sub>+mimic-NC group. \**P* < 0.05, \*\**P* < 0.01, \*\*\**P* < 0.001 compared with the control group. <sup>a</sup>*P* < 0.05, <sup>aaa</sup>*P* < 0.001 compared with miR-NC group. **F:** A549 cells were transfected with TNFSF14 siRNA. Western blot were performed to determine TNFSF14, TSLP, ICAM-1 and IL-1β protein levels (mean ± SD, n=3), \*\**P* < 0.01 compared with the SiO<sub>2</sub> plus siRNA control group. \**P* < 0.05, \*\*\**P* < 0.001 compared with the control group. <sup>a</sup>*P* < 0.05, <sup>aa</sup>*P* < 0.01, <sup>aaa</sup>*P* < 0.001 versus siRNA control group. **G:** A549 cells

were exposed to TNFSF14 plasmid/miR-326 mimic for 24 h. Western blot were performed to determine TNFSF14, TSLP, ICAM-1 and IL-1 $\beta$  protein levels (mean  $\pm$  SD, n=3). \* $P$  < 0.05, \*\* $P$  < 0.01, \*\*\* $P$  < 0.001 compared with the control group. <sup>aa</sup> $P$  < 0.01 compared with SiO<sub>2</sub> + miR-NC group. <sup>bb</sup> $P$  < 0.01, <sup>bbb</sup> $P$  < 0.001 compared with SiO<sub>2</sub> + miR-326 + vector group. **H:** TSLP in A549 cells transfected with miR-326 mimic detected by immunofluorescence staining. Green for TSLP staining. Blue for nuclear DNA staining. **I:** TSLP in A549 cells transfected with TNFSF14 siRNA detected by immunofluorescence staining. Green means TSLP staining. Blue means nuclear DNA staining.

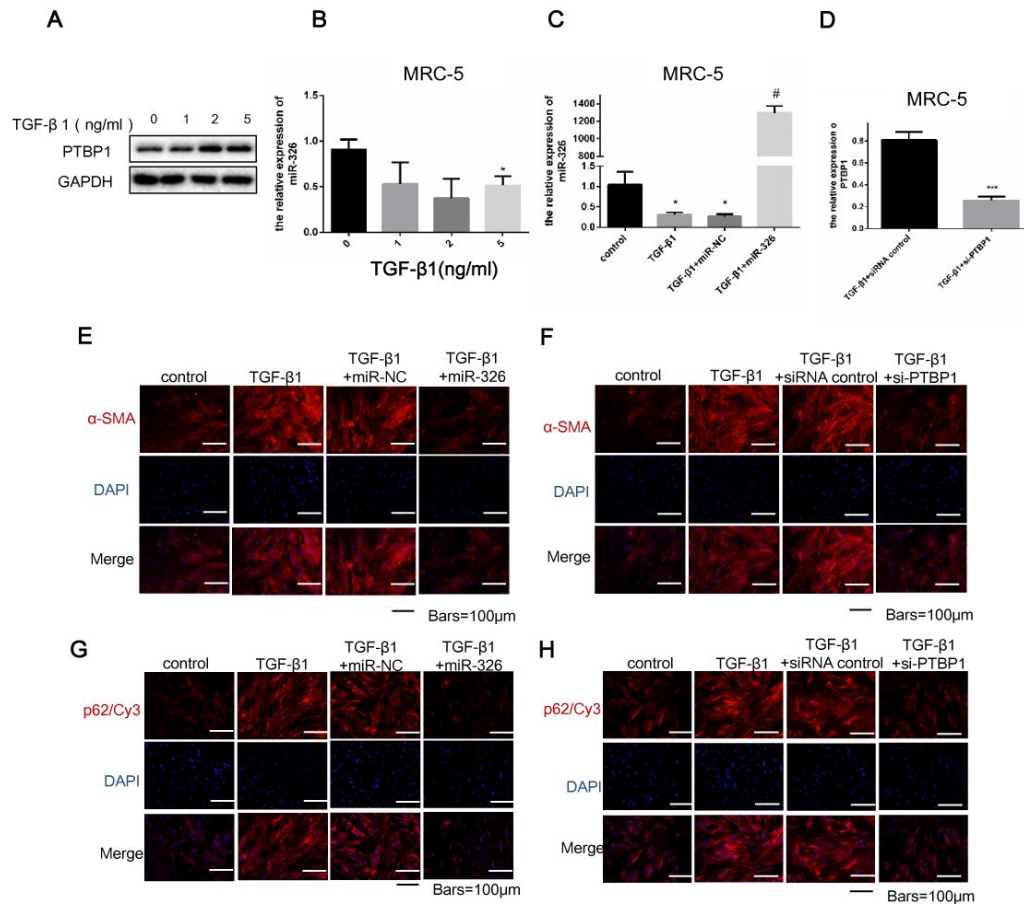

**Figure S4. MiR-326 regulates autophagy by targeting PTBP1 in MRC-5 cells.**

**A:** The MRC-5 cells were exposed to TGF-β1 (0, 1, 2, 5ng/ml) for 48h. Western blot were performed to determine the expression of PTBP1. **B:** MRC-5 cells were exposed to TGF-β1 (0, 1, 2, 5 ng/ml) for 48 h. QRT-PCR analysis was performed to detect miR-326 levels (mean ± SD, n=3), \* $P < 0.05$  compared with 0 ng/ml TGF-β1 treated cells. **C:** The MRC-5 cells were transfected with miR-326 mimic. MiR-326 levels were detected via qRT-PCR (mean ± SD, n=3), \* $P < 0.05$  compared with 0 ng/ml TGF-β1 treated cells. # $P < 0.05$  compared with the TGF-β1 plus mimic-NC group. **D:** MRC-5 cells were transfected with PTBP1 siRNA. PTBP1 levels were detected via qRT-PCR (mean ± SD, n=3), \*\*\* $P < 0.001$  compared with the TGF-β1 + siRNA control group. **E:** MRC-5 cells were transfected with miR-326 mimic. α-SMA were detected via Immunofluorescence staining. Red means α-SMA. Blue means nuclear DNA. **F:** MRC-5 cells were transfected with PTBP1 siRNA. α-SMA were detected via Immunofluorescence staining. Red means α-SMA staining. Blue means nuclear DNA staining. **G:** The MRC-5 cells were transfected with miR-326 mimic. The expression of p62 was detected by immunofluorescence staining. Red represents p62 staining, bars=100μm; blue represents DAPI. **H:** The MRC-5 cells were transfected with PTBP1 siRNA. The expression of p62 was detected by immunofluorescence staining. Red represents p62 staining, bars=100μm. The blue staining represents DAPI.

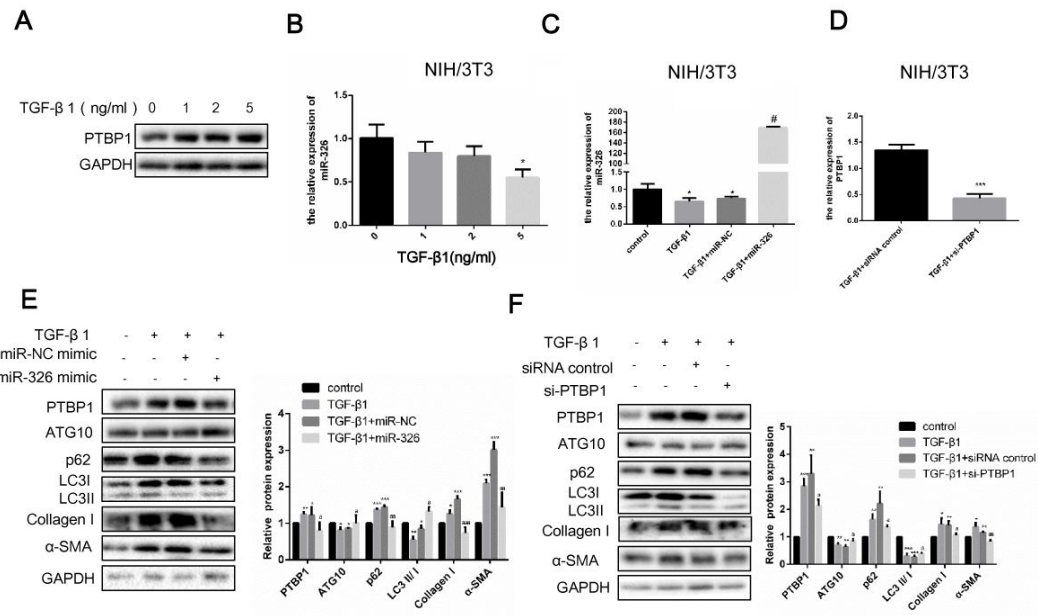

**Figure S5. MiR-326 regulates autophagy by targeting PTBP1 in NIH/3T3 cells.**

**A:** NIH/3T3 cells were exposed to TGF-β1 (0, 1, 2, 5 ng/ml) for 48 h. Western blot were performed to determine PTBP1 expression. **B:** NIH/3T3 cells were exposed to TGF-β1 (0, 1, 2, 5 ng/ml) for 48 h. MiR-326 levels were detected via qRT-PCR (mean ± SD, n=3), \* $P < 0.05$  compared with 0 ng/ml TGF-β1 treated group. **C:** NIH/3T3 cells were transfected with miR-326 mimic. MiR-326 levels were detected via qRT-PCR (mean ± SD, n=3), \* $P < 0.05$  compared with 0 ng/ml TGF-β1 group. # $P < 0.05$  compared with the TGF-β1+ mimic-NC group. **D:** NIH/3T3 cells were transfected with PTBP1 siRNA. PTBP1 levels were detected via qRT-PCR (mean ± SD, n=3), \*\*\* $P < 0.001$  compared with the TGF-β1 + siRNA control group. **E:** NIH/3T3 cells were treated with miR-326 mimic. Western blot analysis were performed to determine PTBP1, ATG10, p62, LC3 I, LC3 II, collagen I and α-SMA protein expression (mean ± SD, n=3), \* $P < 0.05$ , \*\* $P < 0.01$ , \*\*\* $P < 0.001$  compared with the control group. <sup>a</sup> $P < 0.05$ , <sup>aa</sup> $P < 0.01$ , <sup>aaa</sup> $P < 0.001$  compared with TGF-β1+ miR-NC group. **F:** NIH/3T3 cells were treated with PTBP1 siRNA. PTBP1, ATG10, p62, LC3 I, LC3 II, collagen I and α-SMA protein expression were measured by western blot analysis (mean ± SD, n=3), \* $P < 0.05$ , \*\* $P < 0.01$ , \*\*\* $P < 0.001$  compared with the control group. <sup>a</sup> $P < 0.05$ , <sup>aa</sup> $P < 0.01$  compared with TGF-β1 + siRNA control group.

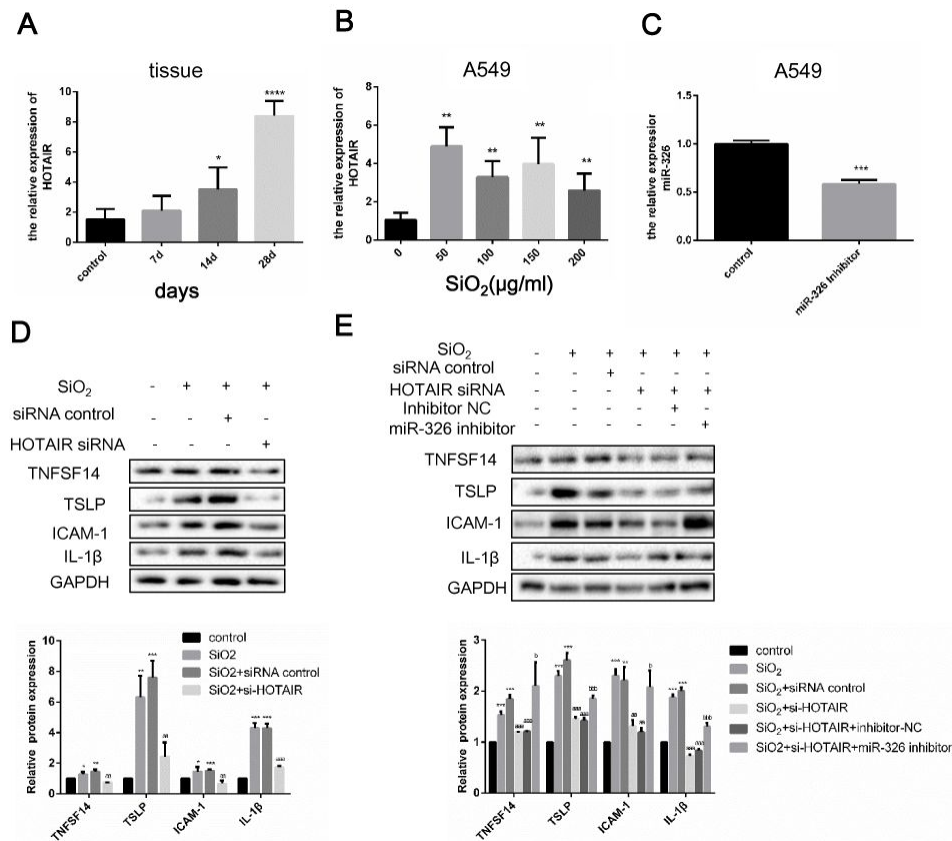

**Figure S6. LncRNA HOTAIR facilitates inflammation via sponging miR-326 in A549 cells.**

**A:** The levels of miR-326 on day 7, 14 and 28 groups compared to the saline group of mice. GAPDH was functioned as the internal control.  $*P < 0.05$ ,  $***P < 0.001$  compared with the control group. **B:** A549 cells were treated with SiO<sub>2</sub> (0, 50, 100, 150, 200 µg/ml) for 24 h. The expression of lncRNA HOTAIR were detected via qRT-PCR (mean  $\pm$  SD,  $n=3$ ),  $**P < 0.01$  compared with 0 µg/ml SiO<sub>2</sub> group. **C:** The A549 cells were exposed to miR-326 inhibitor. The expression of miR-326 were detected by qRT-PCR (mean  $\pm$  SD,  $n=3$ ),  $***P < 0.001$  compared with the control group. **D:** A549 cells were exposed to lncRNA HOTAIR siRNA. Western blot analysis were performed to determine TNFSF14, TSLP, ICAM-1 and IL-1β expression (mean  $\pm$  SD,  $n=3$ ),  $*P < 0.05$ ,  $**P < 0.01$ ,  $***P < 0.001$  compared with the control group.  $^{aa}P < 0.01$ ,  $^{aaa}P < 0.001$  compared with SiO<sub>2</sub> plus HOTAIR siRNA control group. **E:** A549 cells were exposed to lncRNA HOTAIR siRNA/ miR-326 inhibitor for 24 h. Western blot analysis were performed to determine the protein expression of TNFSF14, TSLP, ICAM-1 and IL-1β (mean  $\pm$  SD,  $n=3$ ).  $**P < 0.01$ ,  $***P < 0.001$  compared with the control group.  $^{aa}P < 0.01$ ,  $^{aaa}P < 0.001$  compared with SiO<sub>2</sub> + siRNA control group.  $^{b}P < 0.05$ ,  $^{bbb}P < 0.001$  compared with SiO<sub>2</sub> + HOTAIR siRNA+ miR-326 inhibitor NC group.
